# Supplementary material
Source: publisher site journal article supplement (https://www.dovepress.com/article/398180)
Supplement: Supplementary file 1 [file get_supplementary_file.php]

## Supplementary data

**Figure S1** Patient subgroups based on disease status after last BCG administration

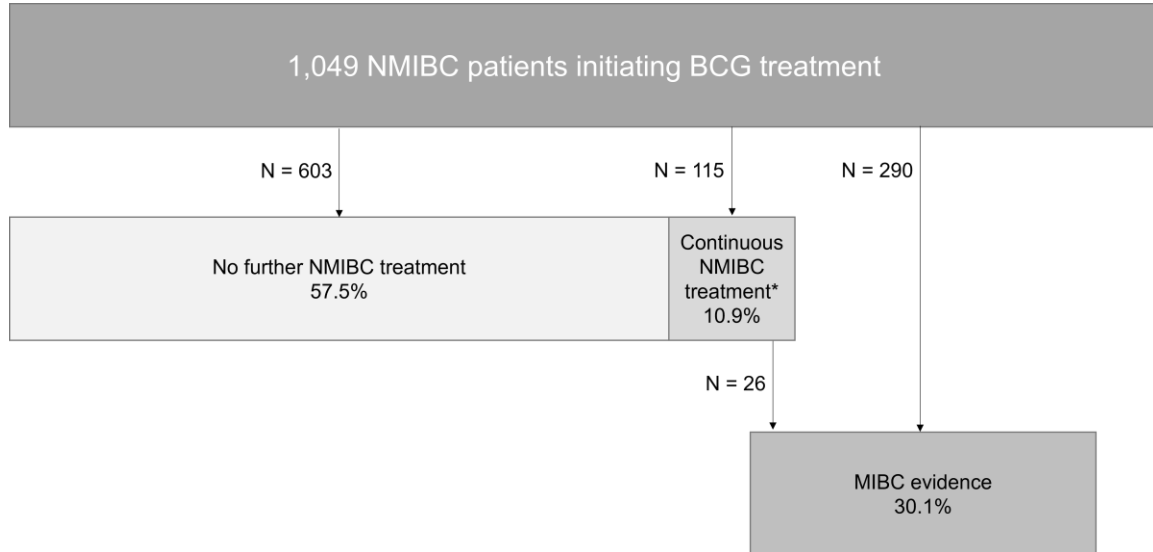

**Notes:**

\*As potential indicator of NMIBC recurrence

145 patients (13.8%) had a cystectomy after last BCG, including 104 patients who also presented NMIBC recurrence or MIBC evidence and 41 patients who had a cystectomy immediately after BCG.
